# Supplementary material for: Changes in the Diversity of Human Skin Microbiota to Cosmetic Serum Containing Prebiotics: Results from a Randomized Controlled Trial
Source: PubMed Central journal article supplement (PMC7564969; doi:10.3390/jpm10030091), 2020-08-17
Supplement: jpm-10-00091-s001.pdf [file jpm-10-00091-s001.pdf]

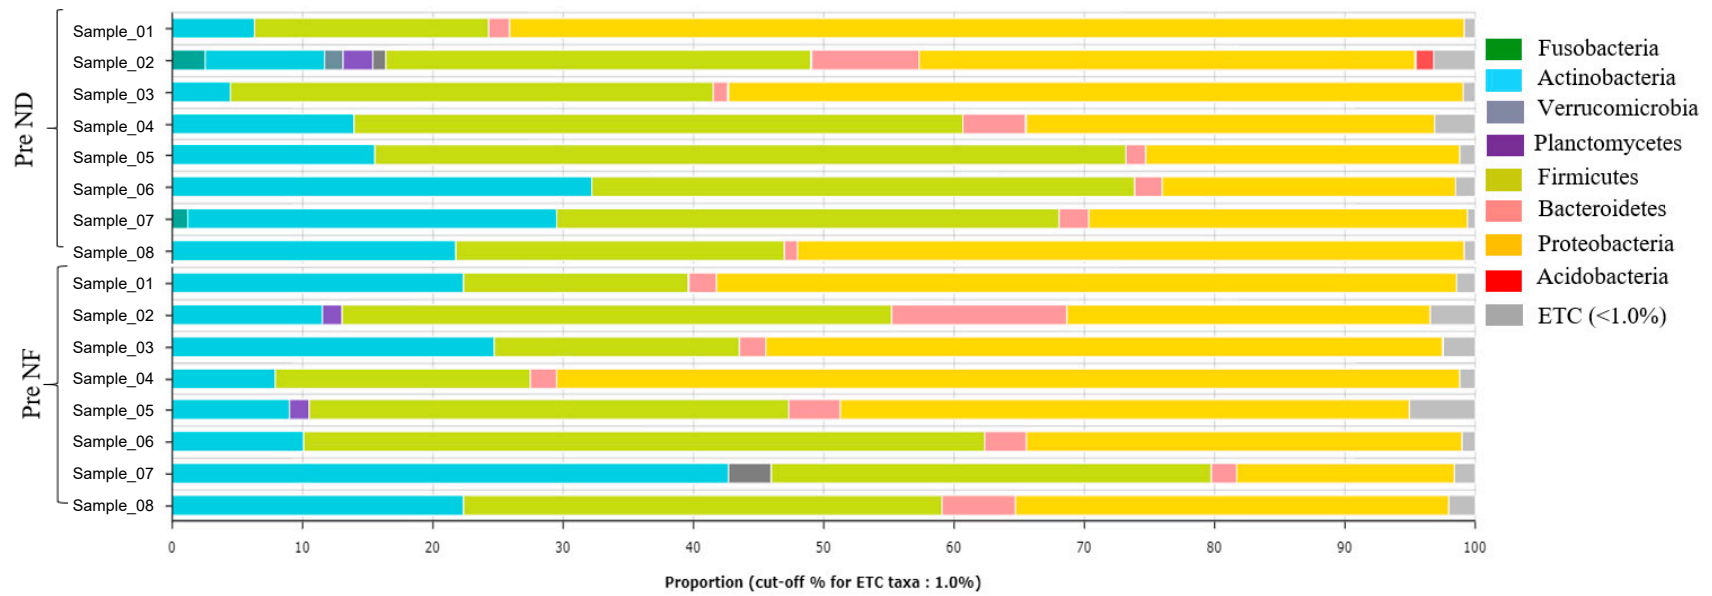

Sup. 1. The relative abundance of the most prevalent bacterial groups associated with each microenvironment depicted for all the subjects investigated. Superscripts indicate phylum.

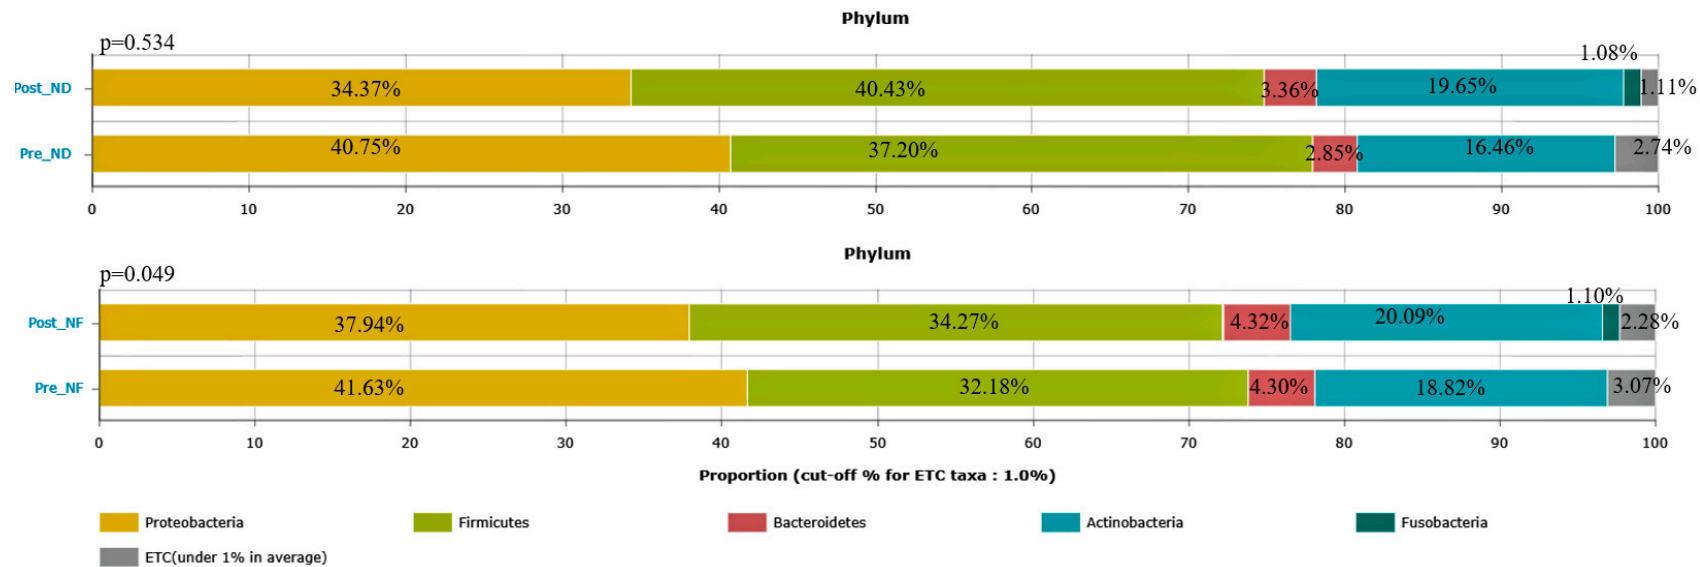

Sup. 2. The relative abundance of the most prevalent bacterial groups in each group.

Sup. 3. The relative abundance of the main genera of bacteria in post-treatment groups (post-ND and post-NF)

| Phylum     | Genus                        | Group             | Abundance (%) | <i>P</i> value | Phylum         | Genus                       | Group                  | Abundance (%) | <i>P</i> value |         |
|------------|------------------------------|-------------------|---------------|----------------|----------------|-----------------------------|------------------------|---------------|----------------|---------|
| Firmicutes | <i>Staphylococcus</i> *      | Post-ND           | 26.32 ± 12.06 | 0.027          | Proteobacteria | <i>Burkholderia</i>         | Post-ND                | 7.10 ± 3.01   | 0.462          |         |
|            |                              | Post-NF           | 13.18 ± 8.85  |                |                |                             | Post-NF                | 8.42 ± 5.56   |                |         |
|            | <i>Streptococcus</i>         | Post-ND           | 1.63 ± 1.08   | 0.208          |                | <i>Sphingomonas</i>         | Post-ND                | 3.29 ± 1.01   | 0.462          |         |
|            |                              | Post-NF           | 4.25 ± 4.29   |                |                |                             | Post-NF                | 3.83 ± 2.02   |                |         |
|            | <i>Thermoanaerobacterium</i> | Post-ND           | 3.74 ± 2.05   | 0.074          |                | <i>Enterobacteriaceae_g</i> | Post-ND                | 4.11 ± 2.61   | 0.753          |         |
|            |                              | Post-NF           | 6.67 ± 4.27   |                |                |                             | Post-NF                | 1.06 ± 1.02   |                |         |
|            | <i>Anaerococcus</i>          | Post-ND           | 2.53 ± 2.07   | 0.916          |                | Actinobacteria              | <i>Cutibacterium</i>   | Post-ND       | 13.69 ± 12.27  | 0.916   |
|            |                              | Post-NF           | 2.33 ± 2.57   |                |                |                             |                        | Post-NF       | 11.44 ± 8.17   |         |
|            | Bacteroidetes                | <i>Prevotella</i> | Post-ND       | 1.60 ± 1.17    |                | 1.00                        | <i>Corynebacterium</i> | Post-ND       | 1.54 ± 0.79    | 0.674   |
|            |                              |                   | Post-NF       | 1.72 ± 2.24    |                |                             |                        | Post-NF       | 0.93 ± 0.51    |         |
|            |                              |                   |               |                |                | <i>Lawsonella</i>           | Post-ND                | 1.77 ± 2.76   | 0.600          |         |
|            |                              |                   |               |                |                |                             | Post-NF                | 3.08 ± 2.05   |                | Post-NF |

The asterisks indicate significant differences (\**p* < 0.05) between the NF and the ND groups in the indicated Genus.

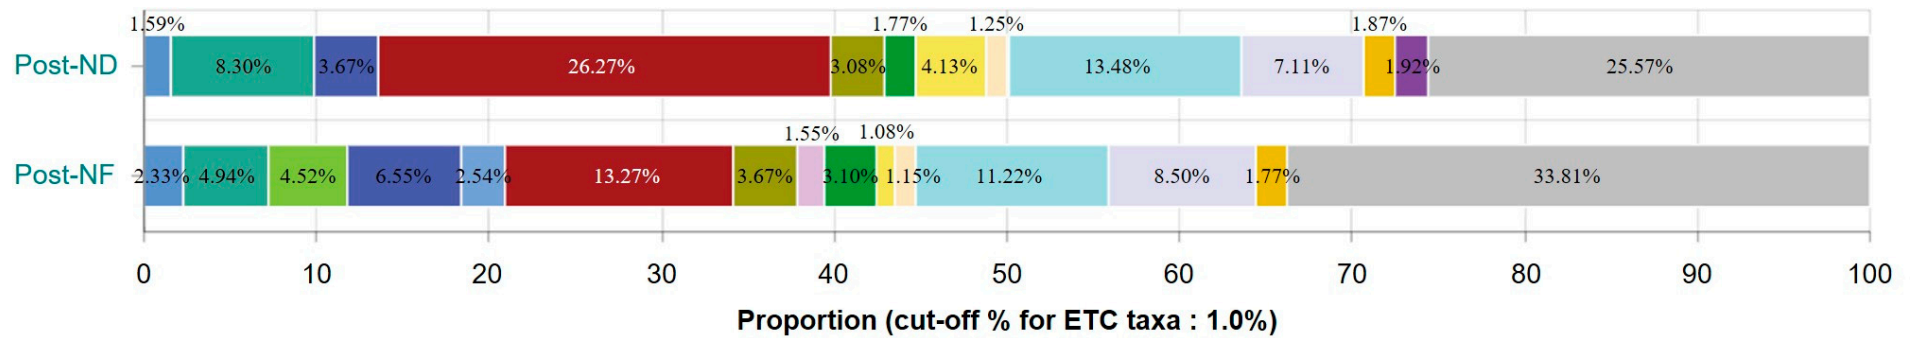

|                                            | Microbial number (counts/DNA) |         | Microbial number (counts/DNA)                         |         |          |
|--------------------------------------------|-------------------------------|---------|-------------------------------------------------------|---------|----------|
|                                            | Post-ND                       | Post-NF | Post-ND                                               | Post-NF |          |
| <i>Caulobacteraceae</i> JPOM_g PAC001012_s | 172.16                        | 367.23  | <i>Neisseriaceae</i> FM873692_g FM873692_s            | 898.67  | 778.59   |
| <i>Xanthomonas citri</i> group             | -                             | 712.39  | <i>Thermoanaerobacterium thermosulfurigenes</i> group | 397.36  | 1032.340 |
| <i>Streptococcus pneumoniae</i> group      | -                             | 400.33  | <i>Staphylococcus aureus</i> group                    | 2844.35 | 2091.47  |
| <i>Sphingomonas pruni</i> group            | 333.48                        | 578.42  | <i>Neisseria perflava</i> group                       | -       | 244.29   |
| <i>Lawsonella clevelandensis</i>           | 191.64                        | 488.59  | <i>Enterobacteriaceae</i> group                       | 477.17  | 170.22   |
| <i>Enhydrobacter aerosaccus</i> group      | 146.75                        | 181.55  | <i>Cutibacterium acnes</i> group                      | 1459.53 | 1768.37  |
| <i>Burkholderia cepacia</i> group          | 769.83                        | 1339.67 | <i>Anaerococcus nagyae</i> group                      | 202.47  | 278.97   |
| <i>Dolosigranulum pigrum</i> group         | 207.89                        | -       | ETC (under 1% in average)                             | 2768.56 | 5328.75  |

Sup. 4. The relative abundance of the main species of bacteria in post-treatment groups (post-ND and post-NF)

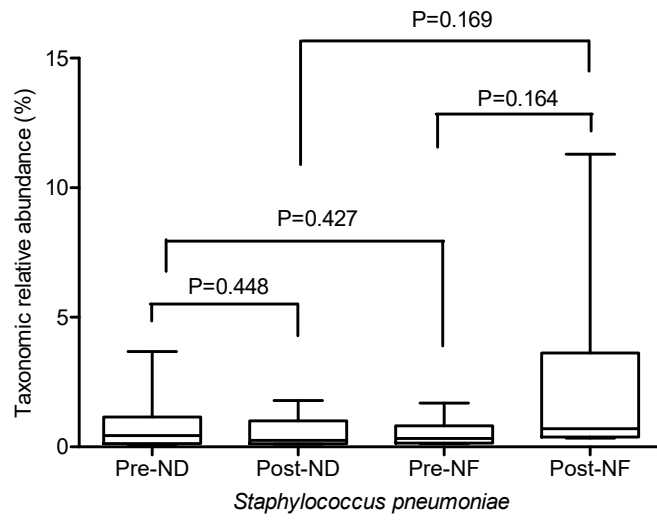

Sup. 5. *Staphylococcus pneumoniae* difference within and between groups. ND (control serum); NF (cosmetic serum containing GOS).
